# Supplementary material
Source: publisher site journal article supplement (https://www.dovepress.com/article/359114)
Supplement: Supplementary file 1 [file get_supplementary_file.php]

**Supplementary materials**

**Table S1: Results of the daily measured weights and observed scores of C57BL/6 mice in all groups.**

| **Days** | **CTRL + PBS** | | **EAE + PBS** | | **EAE + PLGA** | | **EAE + rhMBP** | | **EAE + RTX** | | **EAE + Nano-rhMBP-RTX** | |
| --- | --- | --- | --- | --- | --- | --- | --- | --- | --- | --- | --- | --- |
| **Weight**  **(Mean ± SD)** | **Score (Mean)** | **Weight**  **(Mean sig.± SD)** | **Score (Mean sig. .± SD)** | **Weight**  **(Mean sig.± SD)** | **Score (Mean sig. .± SD)** | **Weight**  **(Mean sig.± SD)** | **Score (Meansig. .± SD)** | **Weight**  **(Mean sig.± SD)** | **Score (Meansig. .± SD)** | **Weight**  **(Mean sig.± SD)** | **Score (Meansig. .± SD)** |
| 0 | 24.2 ± 4.32 | 0 | 22.4 ± 2.97 | 0 | 25.6 ± 2.70 | 0 | 23 ± 4.30 | 0 | 23.2 ± 4.21 | 0 | 24.2 ± 1.48 | 0 |
| 1 | 24.4 ± 4.39 | 0 | 22.2 ± 2.95 | 0 | 25.6 ± 2.70 | 0 | 23.4 ± 4.28 | 0 | 23.2 ± 4.21 | 0 | 24.2 ± 1.48 | 0 |
| 2 | 24.8 ± 4.44 | 0 | 22.2 ± 2.59 | 0.33 ± 0.52 | 25.6 ± 2.70 | 0.33 ± 0.52 | 23.4 ± 4.62 | 0.67 ± 0.52 | 23.4 ± 4.51 | 0 | 24.2 ± 1.48 | 0 |
| 3 | 24.8 ± 4.44 | 0 | 21.4 ± 1.34 | 0.67 ± 0.52 | 25.6 ± 2.70 | 0.67 ± 0.52 | 24.2 ± 4.71 | 1.00 a ± 0.00 | 23.8 ± 4.66 | 0.67 ± 0.52 | 24.2 ± 1.48 | 0d |
| 4 | 25 ± 4.58 | 0 | 21.6 ± 3.05 | 0.67 ± 0.52 | 25.6 ± 2.70 | 0.83 ± 0.41 | 24 ± 4.30 | 1.00 a ± 0.00 | 23.8 ± 4.66 | 1.00a ± 0.00 | 24.2 ± 1.48 | 0.50 ± 0.55 |
| 5 | 25.6 ± 3.78 | 0 | 19.2 ± 1.10 | 1.00a ± 0.63 | 26 ± 3.24 | 1.33a ± 0.52 | 23.8 ± 4.27 | 1.17 a ± 0.41 | 23.8 ± 4.66 | 1.00 a ± 0.00 | 24.2 ± 1.48 | 0.67 ± 0.52 |
| 6 | 25.6 ± 3.78 | 0 | 18 ± 0.71 | 1.17 a ± 0.75 | 25.6 ± 3.65 | 1.33 a ± 0.52 | 23.8 ± 4.27 | 1.50 a ± 0.55 | 24 ± 4.90 | 1.00 a ± 0.00 | 24.2 ± 1.48 | 1.00a ± 0.00 |
| 7 | 25.8 ± 3.77 | 0 | 16.8a ± 1.64 | 1.50 a ± 0.55 | 24.8 ± 4.55 | 1.67 a ± 0.52 | 24.2b ± 4.27 | 1.67 a ± 0.52 | 24 ± 4.90 | 1.33 a ± 0.52 | 24.2 ± 1.48 | 1.00 a ± 0.00 |
| 8 | 26 ± 4.06 | 0 | 16.2a ± 1.64 | 1.67 a ± 0.82 | 24 ± 4.30 | 2.00 a ± 0.63 | 23.8 b ± 4.38 | 2.00 a ± 0.63 | 24.4 ± 4.88 | 1.50 a ± 0.55 | 24 ± 1.87 | 1.00 acd ± 0.00 |
| 9 | 26.2 ± 4.21 | 0 | 15 a ± 2.83 | 2.33 a ± 0.82 | 23.6 ± 3.78 | 2.17 a ± 0.75 | 23.8 b ± 4.38 | 2.33 a ± 0.52 | 24.4b ± 4.88 | 2.00 a ± 0.63 | 24.2b ± 1.92 | 1.17 abcde ± 0.41 |
| 10 | 26.4 ± 4.51 | 0 | 14.8 a ± 3.63 | 2.50 a ± 0.55 | 22.8 ± 4.55 | 2.67 a ± 0.52 | 24.4 b ± 4.34 | 2.67 a ± 0.52 | 25.2 b ± 4.60 | 2.00 a ± 0.63 | 24.4 b ± 2.30 | 1.50abcd ± 0.55 |
| 11 | 26.4 ± 3.85 | 0 | 14.8 a ± 4.38 | 2.50 a ± 0.55 | 21.4 ± 4.39 | 2.67 a ± 0.52 | 23.8 b ± 4.71 | 2.83 a ± 0.41 | 25.2 b ± 4.60 | 2.00 ad ± 0.63 | 25.4 b ± 2.07 | 1.83acd ± 0.75 |
| 12 | 26.2 ± 3.90 | 0 | 14.4 a ± 4.04 | 2.67 a ± 0.52 | 20.2 ± 4.44 | 3.00 a ± 0.00 | 23.6 b ± 4.72 | 2.83 a ± 0.41 | 25.2 b ± 4.60 | 2.33 a ± 0.82 | 25.6 b ± 2.30 | 2.33 a ± 0.52 |
| 13 | 26.2 ± 3.90 | 0 | 14.8 a ± 4.32 | 2.83 a ± 0.41 | 19.6 ± 3.91 | 3.17 a ± 0.41 | 23.4 b ± 4.83 | 3.00 a ± 0.63 | 25.2 b ± 4.60 | 2.50 a ± 0.84 | 26.4 b ± 1.82 | 2.67 a ± 0.52 |
| 14 | 26 ± 3.61 | 0 | 15.2 a ± 4.44 | 3.50 a ± 0.84 | 19.8 ± 3.96 | 3.33 a ± 0.52 | 23.8 b ± 4.11 | 3.17 a ± 0.41 | 25.0 b ± 4.69 | 2.50 abc ± 0.84 | 27.2 bc ± 1.48 | 3.00 a ± 0.00 |
| 15 | 25.8 ± 3.96 | 0 | 15.2 a ± 4.38 | 3.50 a ± 0.84 | 18.2 ± 3.63 | 3.67 a ± 0.52 | 24 b ± 4.55 | 3.33 a ± 0.52 | 25.2 b ± 4.55 | 2.50 abcd ± 0.84 | 28.2 bc ± 1.92 | 2.67 abc ± 0.82 |
| 16 | 26 ± 3.94 | 0 | 15.6 a ± 4.51 | 3.67 a ± 0.82 | 17.8 a ± 3.56 | 3.83 a ± 0.75 | 24 b ± 4.55 | 3.33 a ± 0.33 | 25.4 b ±4.45 | 2.33 abcd ± 0.82 | 28.8 bc ± 1.79 | 2.33 abcd ± 0.82 |
| 17 | 26.6 ± 4.34 | 0 | 15.6 a ± 4.51 | 3.83 a ± 0.75 | 17.6 a ± 3.71 | 3.83 a ± 0.75 | 24.3 bc ± 4.99 | 3.17 a ± 0.41 | 25.4 b ± 4.45 | 2.17 abcd ± 0.75 | 28.8 bc ± 1.64 | 2.00 abcd ± 0.89 |
| 18 | 26.6 ± 4.3 | 0 | 15.8 a ± 4.66 | 3.83 a ± 0.75 | 17.6 a ± 3.71 | 3.83 a ± 0.75 | 23.8 bc ± 5.44 | 3.17 a ± 0.41 | 25.6 b ± 4.39 | 2.17 abcd ± 0.75 | 28.6 bc ± 1.52 | 1.83 abcd ± 0.75 |
| 19 | 27.4 ± 4.22 | 0 | 16 a ± 4.85 | 3.83 a ± 0.75 | 17.2 a ± 3.56 | 4.00 a ± 0.63 | 24 bc ± 5.89 | 3.00 abc ± 0.00 | 25.6 bc ± 4.39 | 2.17 abcd ± 0.75 | 28.6 bc ± 1.52 | 1.83 abcd ± 0.75 |
| 20 | 26.8 ± 4.32 | 0 | 16 a ± 4.85 | 3.83 a ± 0.75 | 17.8 a ± 3.49 | 4.33 a ± 0.52 | 23.8 b ± 5.62 | 2.83 abc ± 0.41 | 25.4 b ± 4.16 | 2.00 abcd ± 0.63 | 28.6 bc ± 1.52 | 1.83 abcd ± 0.75 |
| 21 | 27 ± 4 | 0 | 16.4 a ± 4.93 | 3.67 a ± 1.03 | 17.6 a ± 3.78 | 4.33 a ± 0.52 | 24 bc ± 5.29 | 2.83 abc ± 0.41 | 25.4 b ± 4.04 | 2.00 abcd ± 0.63 | 28.4 bc ± 1.52 | 1.50 abcd ± 0.84 |
| 22 | 27.2 ± 3.96 | 0 | 16.4 a ± 4.98 | 4.00 a ± 0.89 | 17.6 a ± 3.44 | 4.33 a ± 0.52 | 25.3 bc ± 6.03 | 2.83 abc ± 0.41 | 25.8 bc ± 4.15 | 1.83 abcd ± 0.75 | 28.2 bc ± 1.30 | 1.17 abcd ± 0.98 |
| 23 | 27.2 ± 3.96 | 0 | 16.6 a ± 4.56 | 4.00 a ± 0.89 | 17.8 a ± 3.70 | 4.50 a ± 0.55 | 25.3 bc ± 7.02 | 2.83 abc ± 0.41 | 25.8 b ± 4.15 | 1.83 abcd ± 0.75 | 28.6 bc ± 1.52 | 1.00 abcde ± 0.63 |
| 24 | 27 ± 3.81 | 0 | 17 a ± 4.95 | 4.17 a ± 0.75 | 17 a ± 4.18 | 4.50 a ± 0.55 | 26 bc ± 7.55 | 2.83 abc ± 0.41 | 25.8 bc ± 4.32 | 1.83 abcd ± 0.75 | 28.4 bc ± 1.82 | 0.50bcde ± 0.55 |
| 25 | 27.2 ± 3.49 | 0 | 17.2 a ± 4.32 | 4.33 a ± 0.82 | 17 a ± 4.53 | 4.67 a ± 0.52 | 26.3 bc ± 7.64 | 2.83 abc ± 0.41 | 25.8 bc ± 4.32 | 1.83 abcd ± 0.75 | 28.6 bc ± 2.07 | 0.50bcde ± 0.55 |
| 26 | 27.2 ± 3.49 | 0 | 17.2 a ± 4.32 | 4.50 a ± 0.84 | 16.8 a ± 4.32 | 4.67 a ± 0.52 | 25 bc ± 9.90 | 2.83 abc ± 0.41 | 25.8 bc ± 4.49 | 1.67 abcd ± 1.03 | 28.8 bc ± 2.39 | 0.50bcde ± 0.55 |
| 27 | 27.6 ± 3.65 | 0 | 17.2 a ± 4.55 | 4.50 a ± 0.84 | 16.8 a ± 4.60 | 4.67 a ± 0.52 | 24.5 bc ± 10.61 | 2.67 abc ± 0.52 | 25.8 bc ± 4.76 | 1.50 abcd ± 1.05 | 29.2 bc ± 1.92 | 0.50bcde ± 0.55 |
| 28 | 27.4 ± 3.97 | 0 | 17 a ± 4.36 | 4.67 a ± 0.52 | 16.8 a ± 3.96 | 4.67 a ± 0.52 | 25 ± 9.90 | 2.50 abc ± 0.55 | 25.8 bc ± 4.76 | 1.00 abcd ± 0.63 | 29.2 bc ± 1.64 | 0.33bcd ± 0.52 |
| 29 | 27.6 ± 4.04 | 0 | 17.4 a ± 4.04 | 4.67 a ± 0.52 | 17 a ± 3.94 | 4.67 a ± 0.52 | 24.5 bc ± 9.19 | 2.33 abc ± 0.82 | 25.8 c ± 4.76 | 1.00 abcd ± 0.63 | 29.2 bc ± 1.64 | 0.33bcd ± 0.52 |
| 30 | 27.6 ± 4.04 | 0 | 17.4 a ± 4.04 | 4.67 a ± 0.52 | 17 a ± 3.94 | 4.67 a ± 0.52 | 24 c ± 8.49 | 2.17 abc ± 0.75 | 25.6 c ± 5.13 | 1.00 abcd ± 0.63 | 29.2 bc ± 1.64 | 0.50bcd ± 0.55 |

The data were presented as Mean sig. ± SD. Each mean is presented with letters to denote the significance level with reference to other group. (a) CTRL+PBS, (b) EAE+PBS, (c) EAE+PLGA, (d) EAE+rhMBP, (e) EAE+ RTX. **CTRL:** Control, **EAE:** Experimental autoimmune encephalomyelitis, **PBS:** Phosphate buffered saline, **PLGA:** Poly (lactic-co-glycolic-acid), **rhMBP:** Recombinant human myelin basic protein, **RTX:** Rituximab, **Nano-rhMBP-RTX:** Nanoparticle formulation enclosing myelin basic protein with rituximab on its surface.

**Figure S1: Line charts representing the changes in the weights and scores of the mice throughout the period of experimentation especially on days 0, 3, 7, 10, 14, 21 and 28 post induction and the results were plotted accordingly.** The results are presented as follows: (a) and (b) CTRL+PBS group, (c) and (d) EAE+PBS group, (e) and (f) EAE+PLGA group, (g) and (h) EAE+rhMBP group, (i) and (j) EAE+RTX group and (k) and (l) EAE+Nano-rhMBP-RTX. The level of significance is presented with letters with reference to the other groups. (a) CTRL+PBS, (b) EAE+PBS, (c) EAE+PLGA, (d) EAE+rhMBP. Each data point represents the mean of experiments ± S.D. (n = 8). Statistical analyses were performed using Two-way ANOVA followed by Tukey’s post hoc test, and the criterion for statistical significance was set to p < 0.05. **CTRL:** Control, **EAE:** Experimental autoimmune encephalomyelitis, **PBS:** Phosphate buffered saline, **PLGA:** Poly (lactic-co-glycolic-acid), **rhMBP:** Recombinant human myelin basic protein, **RTX:** Rituximab, **Nano-rhMBP-RTX:** Nanoparticle formulation enclosing myelin basic protein with rituximab on its surface.





**Figure S2: Line charts representing the behavioral changes that occurred to the mice with regards to the rotarod and the grip strength throughout the period of experimentation. Both tests were done on days 0, 3, 7, 10, 14, 21 and 28 post induction and the results were plotted accordingly.** The results are presented as follows: (a) and (b) CTRL+PBS group, (c) and (d) EAE+PBS group, (e) and (f) EAE+PLGA group, (g) and (h) EAE+rhMBP group, (i) and (j) EAE+RTX group and (k) and (l) EAE+Nano-rhMBP-RTX. The level of significance is presented with letters with reference to the other groups. (a) CTRL+PBS, (b) EAE+PBS, (c) EAE+PLGA, (d) EAE+rhMBP, (e) EAE+RTX. Each data point represents the mean of experiments ± S.D. (n = 8). Statistical analyses were performed using Two-way ANOVA followed by Tukey’s post hoc test, and the criterion for statistical significance was set to p < 0.05. **CTRL:** Control, **EAE:** Experimental autoimmune encephalomyelitis, **PBS:** Phosphate buffered saline, **PLGA:** Poly (lactic-co-glycolic-acid), **rhMBP:** Recombinant human myelin basic protein, **RTX:** Rituximab, **Nano-rhMBP-RTX:** Nanoparticle formulation enclosing myelin basic protein with rituximab on its surface.





**Figure S3: Line charts representing the movement of the animal in an open field with regards to the vertical movement, total distance, and exploration rate.** These tests were done on days 0, 3, 7, 10, 14, 21 and 28 post induction and the results were plotted accordingly. The results are presented as follows: (a), (b) and (c) CTRL+PBS group, (d), (e) and (f) EAE+PBS group, (g), (h) and (i) EAE+PLGA group, (j), (k) and (l) EAE+rhMBP group, (m), (n) and (o) EAE+RTX group and (p), (q) and (r) EAE+Nano-rhMBP-RTX. The level of significance is presented with letters with reference to the other groups. (a) CTRL+PBS, (b) EAE+PBS, (c) EAE+PLGA, (d) EAE+rhMBP, (e) EAE+RTX. Each data point represents the mean of experiments ± S.D. (n = 8). Statistical analyses were performed using Two-way ANOVA followed by Tukey’s post hoc test, and the criterion for statistical significance was set to p < 0.05. **CTRL:** Control, **EAE:** Experimental autoimmune encephalomyelitis, **PBS:** Phosphate buffered saline, **PLGA:** Poly (lactic-co-glycolic-acid), **rhMBP:** Recombinant human myelin basic protein, **RTX:** Rituximab, **Nano-rhMBP-RTX:** Nanoparticle formulation enclosing myelin basic protein with rituximab on its surface.





**Figure S4: Line charts representing the movement of the animal in an open field with regards to the mobility average speed and the mobility rate.** These tests were done on days 0, 3, 7, 10, 14, 21 and 28 post induction and the results were plotted accordingly. The results are presented as follows: (a) and (b) CTRL+PBS group, (c) and (d) EAE+PBS group, (e) and (f) EAE+PLGA group, (g) and (h) EAE+rhMBP group, (i) and (j) EAE+RTX group and (k) and (l) EAE+Nano-rhMBP-RTX. The level of significance is presented with letters with reference to the other groups. (a) CTRL+PBS, (b) EAE+PBS, (c) EAE+PLGA, (d) EAE+rhMBP, (e) EAE+RTX. Each data point represents the mean of experiments ± S.D. (n = 8). Statistical analyses were performed using Two-way ANOVA followed by Tukey’s post hoc test, and the criterion for statistical significance was set to p < 0.05. **CTRL:** Control, **EAE:** Experimental autoimmune encephalomyelitis, **PBS:** Phosphate buffered saline, **PLGA:** Poly (lactic-co-glycolic-acid), **rhMBP:** Recombinant human myelin basic protein, **RTX:** Rituximab, **Nano-rhMBP-RTX:** Nanoparticle formulation enclosing myelin basic protein with rituximab on its surface.
